1 Type of article: research article

2

3 Running header: A globally invasive sponge

4

5 **The marine sponge *Hymeniacidon perlevis* is a globally-distributed invasive species**

6

7 **Thomas L. Turner**

8 Ecology, Evolution, and Marine Biology Department

9 University of California, Santa Barbara

10 Santa Barbara, CA 93106

11

12 tltturner@ucsb.edu

13

14 ORCID: 0000-0002-1380-1099

15

16 **Abstract**

17 In Elkhorn Slough, a tidal estuary draining into Monterey Bay, California, the intertidal is  
18 occupied by a conspicuous orange sponge known by the name *Hymeniacidon sinapium*.

19 This same species is found in the rocky intertidal zone of the outer coast of California,  
20 and is described herein from subtidal kelp forests of Southern California. Farther afield,  
21 morphologically and ecologically indistinguishable sponges are common in estuaries and  
22 intertidal areas in Asia, Europe, South America, and Africa. Here I use morphological,  
23 ecological, and genetic data to show that these sponges are all members of the same

24 globally-distributed species, which should be known by the senior synonym *H. perlevis*.

25 Though previous authors have remarked upon the morphological, ecological, and/or  
26 genetic similarity of various distant populations, the true scope of this sponge's  
27 distribution appears to be unrecognized or unacknowledged in the literature. Limited  
28 larval dispersal, historically documented range expansion, and low genetic variation all  
29 support a hypothesis that this sponge has achieved its extraordinary range via human-  
30 mediated dispersal, making it the most widely-distributed invasive sponge known to date.

31

32 **Keywords**

33 Porifera, sponges, invasive species, kelp forest, intertidal, estuaries

34

35 **Declarations**

36 Conflicts of interest/Competing interests: none to declare

37

38 Availability of data and material: All raw data is included as supplementary files;  
39 georeferenced collection data is available as a supplementary .xls file; genetic data are  
40 archived at Genbank; specimen vouchers are archived at the California Academy of  
41 Sciences and at the Natural History Museum of Los Angeles; specimen photos will be  
42 made available as supplementary files, are also archived by the associated museums in  
43 GBIF, and are posted as georeferenced data on iNaturalist.org.

44

45 Code availability: n/a

46

## 47 **Introduction**

48 In coastal marine ecosystems, filter-feeding marine invertebrates are among the most  
49 important invasive species in terms of species diversity, biomass, and ecological impacts  
50 (Ruiz et al. 2000; Bax et al. 2003; Byrnes and Stachowicz 2009). Sponges (phylum  
51 Porifera) are a diverse group of filter-feeding organisms that are found in all marine  
52 environments. They provide unique ecosystems services (and potential disruptions)  
53 because they preferentially consume the smaller size fractions of the plankton, such as  
54 viral and bacterial plankton (Reiswig 1971; Maldonado et al. 2012; Welsh et al. 2020).  
55 They can also have major effects on nutrient cycling, as some sponges convert dissolved  
56 nutrients into particulate matter available to other animals (de Goeij et al. 2013).

57  
58 Our understanding of invasive sponges has been limited by an incomplete taxonomy.  
59 Sponges have simpler morphologies than most animals, confounding traditional  
60 classification schemes (Morrow and Cárdenas 2015). Many species were initially  
61 described as having a wide geographic range, but in recent decades these taxa have been  
62 recognized as clades comprised of multiple species with similar morphologies (Knowlton  
63 1993; Xavier et al. 2010). This is consistent with what is known about larval dispersal in  
64 sponges. All known sponge larvae are lecithotrophic, meaning that they have no ability to  
65 feed until they settle and develop into juveniles (Maldonado 2006). They have a short  
66 planktonic stage, lasting from minutes to a few days (Maldonado 2006). Some sponges,  
67 however, do seem to have broad geographic ranges, and this is likely due to human-  
68 mediated transport. Carballo et al. (2013) list seven species thought to have recent range  
69 expansions, including two that have moved between the Pacific and Atlantic basins.  
70 Some of these species are likely to have been accidentally introduced with aquaculture  
71 (Henkel and Janussen 2011; Fuller and Hughey 2013). Trawling, hull-fouling, and other  
72 activities also likely play a role (Carballo et al. 2013).

73  
74 In the current work, I describe what appears to be the most common and widely  
75 distributed invasive sponge known to date. Genetic and morphological data support a  
76 distribution that includes Europe, the Atlantic coasts of North and South America, the  
77 Pacific coast of North America, and Asia. Morphological data suggest it is also present in  
78 New Zealand, Southwest Africa, and the Pacific coast of South America, but genetic data  
79 are not yet available from these populations. In much of this range, it is among the most  
80 common sponges in multiple habitats. In Europe, this species is known as *Hymeniacidon*  
81 *perlevis* (Montagu 1814). The range of *H. perlevis* was already thought to be substantial:  
82 from Norway in the North to the Macronesian Islands off Africa in the South (Erpenbeck  
83 and Van Soest 2002). Within this range it is found in diverse habitats, including both the  
84 intertidal and the subtidal zones, and it can grow buried in sediment or on hard substrate  
85 (Erpenbeck and Van Soest 2002). It is often abundant in these habitats, and is considered  
86 to be one of the most common sponges in Europe (Erpenbeck and Van Soest 2002). It has  
87 been described by other taxonomists as also occurring in New Zealand (Bergquist 1961,  
88 1970) and as the most abundant intertidal sponge in Western South Africa (Samaai and  
89 Gibbons 2005), but these records were rejected from the consensus view (Van Soest et al.  
90 2020a), probably because limited dispersal ability seemed to make such a range  
91 implausible. Sponges from additional parts of the globe have been described as  
92 morphologically indistinguishable from *H. perlevis*, but in these cases taxonomists put

93 forth other names for these distant populations. For example, de Laubenfels described a  
94 sponge he named *Hymeniacidon sinapium* from California in 1930 (de Laubenfels 1930,  
95 1932). He acknowledged that "it is doubtful whether this is a new form", and went so far  
96 as to suggest that species with the names "*sanguinea*, *luxurians*, *caruncula*, *heliophila*,  
97 *sinapium*, and perhaps even more species" are in fact synonyms. Consistent with this  
98 prediction, the European species *sanguinea* and *caruncula* have been synonymized with  
99 *H. perlevis* (Van Soest et al. 2020a). The status of *H. luxurians* is unclear (Van Soest et al.  
100 2020b), but the other two species, *H. sinapium* and *H. heliophila*, are still considered  
101 valid. In the current work, I will present evidence that *H. sinapium* is conspecific with *H.*  
102 *perlevis*, and that most sponges placed under the name *H. heliophila* are also *H. perlevis*.  
103

104 When describing *H. sinapium* in California, de Laubenfels remarked on its impressive  
105 ecological breadth. He described it as abundant in the "surf-beaten" intertidal throughout  
106 Southern California, but also the most abundant sponge on the oyster beds in Newport  
107 Bay (de Laubenfels 1932). He reported only one sample from subtidal depths, but his  
108 subtidal sampling was limited, primarily via trawling. In contrast to this abundance in  
109 Southern California, de Laubenfels was only able to locate a single specimen of this  
110 species in Central California. This is notable because he was based at Hopkins Marine  
111 Station in Monterey Bay (Central California) in the 1920s, and this was the area that he  
112 studied most comprehensively at that time. A monographic report on Elkhorn Slough,  
113 which drains into Monterey Bay, was published in 1935: it reports 4 species of sponges in  
114 the estuary, but none similar to *H. sinapium* (MacGinitie 1935). This makes it unlikely  
115 that this species was present in large numbers in Central California in the 1920s.  
116 Subsequently, however, it has become a common species in intertidal portions of Elkhorn  
117 Slough, which drains into Monterey Bay (Wasson et al. 2001), and it is also known from  
118 Tomales Bay in Northern California (Wasson et al. 2001; Fuller and Hughey 2013).  
119 Morphological (Sim 1985) and genetic (Hoshino et al. 2008) comparisons later confirmed  
120 that a common *Hymeniacidon* in Korea, Japan, and China were the same species as those  
121 in California, so it was proposed that *H. sinapium* was introduced to California from Asia  
122 with oyster mariculture (Fuller and Hughey 2013). Though this is certainly possible, the  
123 data I compile here illustrates that it may also be non-native in Asia. This species has  
124 been said to occur in the Mexican Pacific (Hofknecht 1978) and the Galapagos Islands  
125 (Desqueyroux-Faúndez and Van Soest 1997) as well, but genetic data are not yet  
126 available from those populations.  
127

128 The final species to consider, *H. heliophila* (Wilson 1911), is ascribed a substantial range  
129 in the Western Atlantic, from the Gulf of Maine to Brazil (Muricy and Hajdu 2006;  
130 Weigel and Erwin 2016; Van Soest et al. 2020c). Originally described as the most  
131 abundant sponge in Beaufort Harbor North Carolina (Wilson 1911), it is also said to be  
132 very common in the Caribbean (Diaz et al. 1993). A recent paper also found that an  
133 indistinguishable sponge was the most common intertidal sponge present in the Bahía  
134 San Antonio, Argentina, (Gastaldi et al. 2018). In this case, the authors opted to refer to  
135 their samples by the name *H. perlevis*, as the Argentinian samples were indistinguishable  
136 from ones in Northern Europe in genotype, habitat, and morphology (Gastaldi et al. 2018).  
137

138 Here, I build on these results by 1) analyzing additional samples from Southern  
139 California, which contains the type locality for *H. sinapium*, and 2) compiling all publicly  
140 available genetic data (from 20 publications and several unpublished datasets). When  
141 presented together, the data provide a compelling case for a single species ranging across  
142 both the Atlantic and Pacific basins and the Northern and Southern hemispheres. Given  
143 the limited dispersal capabilities of the species (Xue et al. 2009), the limited genetic  
144 variation over most of its range (see below), and the historically documented range  
145 expansion in California, these data are most consistent with an invasive spread via human  
146 facilitation.

147

## 148 **Methods**

149

### 150 *Collections*

151 Sponges were located while SCUBA diving. Effort was made to photo-document all  
152 sponge morphotypes present at each dive site, so that data on presence vs. absence could  
153 be compiled. It should be noted, however, that search time was higher at some sites than  
154 others, as shown in supplementary table 1. The search times listed are the total dive time,  
155 cumulative across all dives at a site. This only approximates search effort, as some dives  
156 were spent mainly searching and photographing sponges, while on others considerable  
157 time was spent collecting samples. Collections were made by hand with a small knife.  
158 Samples were placed individually in plastic bags while underwater, accompanied with  
159 copious seawater. These bags were put on ice until preservation, which was generally  
160 within 2-5 hours, but sometimes up to 12 hours. Samples were moved directly from  
161 seawater to 95% ethanol; in most cases, the preservative was changed with fresh 95%  
162 ethanol after 1-3 days, and sometimes changed again if it remained cloudy. Most samples  
163 were photographed underwater with an Olympus TG5 before collection and  
164 photographed again in the lab. These photos (and the microscope images discussed  
165 below) accompany this paper as supplementary data and are also posted as georeferenced  
166 records on the site iNaturalist.org. Two samples were collected during the "LA Urban  
167 Ocean Bioblitz", and are present as vouchers at the Natural History Museum of Los  
168 Angeles. Three other samples were deposited with the California Academy of Sciences in  
169 San Francisco. Voucher numbers are shown in supplementary table 1. This table lists all  
170 samples known or suspected to be *Hymeniacidon sinapium*. Note that the standard of  
171 evidence is variable in each case, as indicated in the table (e.g. some were photographed  
172 but not collected, and the ID is therefore tentative; see results for further details).

173

### 174 *Spicules*

175 Sponge spicules were examined by digesting soft tissues in bleach. A subsample of the  
176 sponge was chosen, taking care to include both the ectosome and choanosome. This was  
177 placed in a 1.5 ml microcentrifuge tube with household bleach for several hours, until  
178 tissue appeared to be dissolved. With the spicules settled at the bottom of the tube, the  
179 bleach was then pipetted off and replaced with distilled water; this was repeated several  
180 times (I found that 2-3 water changes were sufficient for visualizing spicules with a light  
181 microscope, but removing all the salt from the sample for other downstream applications  
182 required 5 or more rinses and worked best when the final ones were done with absolute

183 ethanol). In some cases, samples were centrifuged at low speed to reduce settling time  
184 between rinses, though this increased the proportion of broken spicules.

185  
186 Spicules were imaged using a compound triocular scope and pictures were taken using a  
187 D3500 SLR camera (Nikon) with a NDPL-1 microscope adaptor (Amscope). Pictures of  
188 a calibration slide were used to determine the number of pixels per mm, and 20-30  
189 spicules were then measured using ImageJ (Schneider et al. 2012). Spicules length was  
190 determined in a straight line from tip to tip, even when spicules were curved or bent.  
191 Spicules were selected randomly, so as to get an unbiased estimate of size distributions.  
192 All raw data are available as supplementary table 2. I also imaged the spicular  
193 architecture in cleared tissue sections. I used a razor blade to cut perpendicular sections  
194 that were as thin as possible by hand, and removed the surface layer (ectosome) by hand  
195 for a surface view. These sections, already in 95% ethanol, were soaked in 100% ethanol  
196 for a short time and then cleared for several hours in HistoClear (National Diagnostics).

197

### 198 *Genotyping*

199 DNA was extracted from small subsamples, taking care to minimize contamination by  
200 the many sponge-associated organisms that are often present. Some samples were  
201 extracted with the Qiagen Blood & Tissue kit while the others were extracted with the  
202 Qiagen Powersoil kit. The "barcoding" region of the *cox1* gene was amplified using the  
203 Folmer primers LCO1490 (GGTCAACAAATCATAAAGAYATYGG) and HCO2198  
204 (TAAACTTCAGGGTGACCAAARAYCA) (Folmer et al. 1994). A single attempt was  
205 made to amplify a longer region using the primers from Rot et al. (Rot et al. 2006):  
206 LCO1490 and COX1-R1 (TGTTGRGGGAAAAARGTTAAATT) but without success. A  
207 portion of the 18S locus was amplified using the primers SP18aF  
208 (CCTGCCAGTAGTCATATGCTT) and 600R18S (CGAGCTTTTAACTGCAA)  
209 (Redmond et al. 2013); the C2-D2 region of 28S was amplified using primers C2  
210 (GAAAAGAAGCTTTGRARAGAGAGT) and D2 (TCCGTGTTTCAAGACGGG)  
211 (Chombard et al. 1998). All primer sequences are listed 5' to 3'. PCR was performed in a  
212 Biorad T100 thermocycler with the following conditions: 95C for 3 min, followed by 35  
213 cycles of 94C for 30 sec, 52C for 30 sec, 72C for 1 min, followed by 72C for 5 minutes.  
214 The C2-D2 28S region was amplified with a 57C annealing temperature instead of 52C.  
215 PCR was performed in 50 ul reactions using the following recipe: 24 µL nuclease-free  
216 water, 10 µL 5x PCR buffer (Gotaq flexi, Promega), 8 µL 25mM MgCl<sub>2</sub>, 1 µL 10mM  
217 dNTPs (Promega), 2.5 µL of each primer at 10 µM, 0.75 µL bovine serum albumin (10  
218 mg/ml), 0.25 µL Taq (Gotaq flexi, Promega), 1 µL template. ExoSAP-IT (Applied  
219 Biosystems) was used to clean PCRs, which were then sequenced by Functional  
220 Biosciences (Madison, Wisconsin) using Big Dye V3.1 on ABI 3730xl instruments. All  
221 PCR products were sequenced in both directions, and a consensus sequence was  
222 constructed using Codon Code v.9 (CodonCode Corporation). Blastn was used to verify  
223 that the resulting traces were of sponge origin; all sequences have been deposited in  
224 Genbank as accessions MT007958-MT007960 (*cox1*), MT001298 (18S), and MT006362  
225 and MT422190 (28S). See supplementary table 3 for additional details and information.

226

### 227 *Genetic analysis*



228 I retrieved all sequences with high sequence similarity to *H. perlevis* from Genbank. I  
229 used the NCBI taxonomy browser to compile all data from samples identified as *H.*  
230 *perlevis*, *H. sinapium*, *H. heliophila*, and *H. flavia*. Together, these data are from 20  
231 different publications and several datasets that were deposited in Genbank but never  
232 published (Erpenbeck et al. 2002, 2004, 2005, 2006, 2007; Park et al. 2007; Hoshino et al.  
233 2008; Turque et al. 2008; Erwin et al. 2011; Alex et al. 2012, 2013; Morrow et al. 2013;  
234 Redmond et al. 2013; Thacker et al. 2013; Fuller and Hughey 2013; Jun et al. 2015;  
235 Miralles et al. 2016; Weigel and Erwin 2016; Gastaldi et al. 2018; Regueiras et al. 2019).  
236 I also retrieved all samples identified as *Hymeniacidon* sp. and checked these and other  
237 sequences using blastn for similarity to *H. perlevis/sinapium/heliophila*. Only four of  
238 these (JN093018 and KU697715-KU697717), all identified as *Hymeniacidon* sp., were  
239 closely related to the other samples, and all appeared to be identical to other sequences  
240 within the *H. perlevis* clade. These four unidentified samples were not included in  
241 downstream analyses.

242  
243 I was not able to use all sequences in every analysis because of differences in the  
244 sequenced portion of the gene or a lack of information regarding collecting location.  
245 Importantly, no samples were excluded simply because they showed discordant patterns  
246 of sequence variation. Supplementary table 3 lists every Genbank accession found,  
247 indicates which were included in each analysis, and explains the reasons why any were  
248 excluded. Some reads were included in the phylogenetic analysis, which could tolerate  
249 unequal read lengths, but not the haplotype network, which included only samples with  
250 complete data over the entire alignment. Sequence alignments were produced in Codon  
251 Code v.9 (CodonCode Corporation). Haplotype networks were produced using the  
252 minimum spanning method (Bandelt et al. 1999) as implemented in Popart (Leigh and  
253 Bryant 2015). Phylogenies were estimated with maximum likelihood using IQ-Tree  
254 (Nguyen et al. 2015; Trifinopoulos et al. 2016). I used a GTR model of sequence  
255 evolution and used the Ultrafast bootstrap (Hoang et al. 2018) to measure node  
256 confidence. Phylogenies were produced from the IQ-Tree files using the Interactive Tree  
257 of Life webserver (Letunic and Bork 2019). Figures were made ready for publication  
258 using R (r-project.org) and/or Gimp (gimp.org).

259

## 260 **Results**

261

### 262 *Status in Southern California*

263 Little data has been published about the distribution of *Hymeniacidon sinapium* in  
264 California outside of bays and estuaries. Past surveys have focused on intertidal habitat  
265 and/or subtidal sampling via deep water trawl (de Laubenfels 1932; Sim and Bakus 1986;  
266 Bakus and Green 1987; Green and Bakus 1994). It was therefore unknown if *H. sinapium*  
267 is present in kelp forest ecosystems. I searched for it using SCUBA at 47 sites in  
268 Southern and Central California (table S1). Subtidal sites were shallow rocky reefs except  
269 for two locations which were oil platforms. Subtidal sites include four marine protected  
270 areas along the mainland coast and three marine protected areas within the Channel  
271 Islands National Marine Sanctuary. Six of the sites are also field sites within the Santa  
272 Barbara Coastal Long-Term Ecological Research Network (sbclter.msi.ucsb.edu).

273 Though the survey was focused on kelp forest habitats, I also checked two intertidal sites  
274 and floating docks in two harbors, as shown in table S1.

275

276 The distribution of *H. sinapium* in the Channel Islands region, where sampling was most  
277 comprehensive, is shown in figure 1. I found the sponge at 8 of 19 mainland reefs in  
278 Southern California, including both mainland marine protected areas investigated in  
279 Southern California (Naples and Campus Point Marine Protected Areas). In only one  
280 location (Carpinteria Reef) did I find *H. sinapium* growing on rock; in all other locations  
281 it was largely buried in sediment, with projections extending into the water column. In  
282 contrast to its prevalence on the Southern California mainland, I did not find it at any  
283 island sites. This difference seems unlikely to be due to dispersal limitation because  
284 island and mainland sites have high connectivity (Watson et al. 2010). It is more likely  
285 due to the ecological differences between sites: none of the island sites investigated had  
286 areas with the fine silty sediment where the sponge was most common on the mainland.  
287 Though silty sites at the islands may simply have been unsampled in this survey, it is  
288 likely they are less common than on the mainland. For example, satellite data show that  
289 particles at the islands are less prone to resuspension by wave action (Freitas et al. 2017).  
290 An intertidal survey of island sites in the 1970s did find *H. sinapium* at both San Miguel  
291 and Santa Rosa Islands (Bakus and Green 1987). It has also been reported from the more  
292 Southern islands of Catalina and San Clemente, which were barely sampled by my survey  
293 (Sim and Bakus 1986; Bakus and Green 1987). To the North, in Central California, I only  
294 surveyed three subtidal sites. I did not find *H. sinapium* in any of these Central California  
295 sites, nor did I find it at the few intertidal sites, floating docks, or oil rigs that were  
296 checked.

297

298 Together, my recent collections and the published intertidal and bay surveys in California  
299 produce a portrait of a species that thrives in a wide variety of conditions, from bays to  
300 the rocky intertidal to the kelp forest (Lee et al. 2007). It seems most abundant in the  
301 intertidal in some bay habitats with a muddy substrate and high sedimentation, and seems  
302 more common in the kelp forest where fine sediment is found. These data are completely  
303 consistent with the published descriptions of habitat preferences for *H. perlevis* in Europe  
304 (Erpenbeck and Van Soest 2002) and *H. heliophila* in the Western Atlantic (Weigel and  
305 Erwin 2016).

306

### 307 *Gross Morphology of kelp forest samples*

308 All but one of the newly collected samples were found embedded in sediment with  
309 irregular projections extending into the water column. These projections varied from  
310 stout cone-shaped or bag-shaped oscula to long, tendril-like digitations. One sponge was  
311 found unburied, growing on rock. It lacked projections and instead resembled  
312 *Halichondria panicea* (its identity was confirmed with spicule and DNA data, presented  
313 below). All samples had a fleshy consistency, with the rock-dwelling sponge somewhat  
314 firmer. Color varied from yellow to yellowish-orange in the field. Field photos are  
315 available for 8 samples in the supplementary data accompanying this paper, and are also  
316 available at iNaturalist.org.

317

318 I was interested in whether these sponges could be identified in the field and therefore  
319 monitored using roving diver surveys or photo transects. These samples were collected as  
320 part of an ongoing project to characterize the diversity of kelp forest sponges, with over  
321 500 samples collected to date. This is one of the first surveys of sponges in California via  
322 SCUBA, and the first with extensive field photos of specimens that have also been  
323 analyzed morphologically. Though the bulk of these data will be published elsewhere,  
324 comparisons to date indicate that *H. sinapium* is the only sponge in these habitats that  
325 grows by extending irregularly shaped projections out of silty sediment. Though this  
326 morphology is certainly known from other species, *H. sinapium* was the only sponge with  
327 this morphology found within the sampling effort shown in supplementary table 1. This  
328 indicates that this morphology, when found in the Southern California kelp forest, is  
329 strongly suggestive of the presence of this species. The most similar species found to date  
330 is *Polymastia pachymastia*: as the name suggests, this sponge is covered in nipple-like  
331 projections. This sponge was also found covered in sediment, with only the projections  
332 visible. However, these projections tend to be uniform in shape and regularly spaced in *P.*  
333 *pachymastia*, which contrasts with the irregularly spaced and morphologically various  
334 projections seen in *H. sinapium*. The projections are also nearly white in *P. pachymastia*,  
335 while they vary from yellow to nearly orange in *H. sinapium*. The rock-dwelling *H.*  
336 *sinapium* found at Carpenteria Reef, however, would be more challenging to identify  
337 from field photos, as it is very similar to other Halichondridae found in the survey.

338

### 339 *Spicular morphology*

340 I characterized the spicules of 9 samples to confirm their identity and compare them to  
341 published data. All spicules were styles: tapered to a point at one end, and rounded at the  
342 other. Width was usually uniform over the entire length, but a small minority had faint  
343 swelling at or near the rounded end. This was manifest as a very weak swollen head  
344 including the end (similar to the head of a match), or more commonly as a swollen band  
345 near the head end (like a bead on a string). Most were somewhat curved or bent. The  
346 skeleton of one sample was investigated further using hand-cut sections cleared with  
347 Histoclear. Spicules in perpendicular sections through the choanosome formed wavy,  
348 meandering tracts, the largest of which were about 30  $\mu\text{m}$  wide. Spicules were also found  
349 outside the tracts pointing in all directions (referred to as a "confused" arrangement in  
350 sponge taxonomy). Surface sections revealed that the ectosome of the sponge was filled  
351 with spicules that appeared to be tangential (parallel to the sponge surface) and also  
352 "paratangential" (at an angle to the surface of less than 90 degrees). These spicules were  
353 in messy bundles that formed an approximate mesh on the surface of the sponge. Table 1  
354 shows measurements of spicules as compared to values published in other studies of  
355 *Hymeniacidon*. Newly collected data are consistent with published data from *H. sinapium*,  
356 *H. perlevis*, and *H. heliophila*, as well as *H. fernandezi* (Thiele 1905) from Chile (for  
357 which no genetic data is yet available). The arrangement of spicules in cleared sections is  
358 also congruent with the spicular architecture described for *H. perlevis* and other species  
359 (Erpenbeck and Van Soest 2002). Photos of tissue sections and spicules are available as  
360 supplementary data.

361

### 362 *Genetic analysis*



363 I sequenced the newly collected samples at the *cox1* locus (3 samples), the 18S rDNA (1  
364 sample) and the 28S rDNA (2 samples). A sample of the *Hymeniacidon sinapium*  
365 holotype was also loaned to me by the Smithsonian Natural History Museum: despite  
366 repeated attempts, I was unable to amplify DNA from this sample. This was not  
367 surprising, as it was collected in 1926 and little is known about its initial preservation.

368  
369 I mined Genbank for all DNA data available for *H. perlevis*, *H. sinapium*, and *H.*  
370 *heliophila* (see methods). I generated sequence alignments for four loci: *cox1*, 18S rDNA,  
371 28S rDNA, and a locus spanning the first intergenic transcribed spacer, the 5.8S rRNA,  
372 and the second intergenic transcribed spacer (hereafter referred to as the ITS). No other  
373 locus had more than 2 sequences available in Genbank from any of these taxa.  
374 Preliminary phylogenies indicated that sequences of *Hymeniacidon flavia* were more  
375 closely related to the clade containing my target species than anything else in Genbank.  
376 When available, these sequences were included for comparison.

377  
378 Figure 2 shows the haplotype networks for the three loci with the most data. A large  
379 dataset was available for 226 base pairs at the ITS locus. A set of 271 sponges from Japan  
380 and Korea contained little genetic variation, as previously described (Park et al. 2007;  
381 Hoshino et al. 2008). Samples from Northern, Central, and Southern California were all  
382 identical to the most common Asian haplotype, as were 9 of 10 samples of *H. heliophila*  
383 from the Eastern United States. These include samples from Alabama, Florida, and North  
384 Carolina. This last sequence read is the only one available that is identified as coming  
385 from this state, which contains the type location for *H. heliophila*. As a useful  
386 comparison to the diversity in 298 samples of *perlevis/heliophila/sinapium*, a population  
387 sample of 212 *H. flavia* are shown. These are all from Japan, yet they contain a similar  
388 amount of diversity as the worldwide sample from *H. perlevis/heliophila/sinapium*. In  
389 contrast to the lack of divergence between *H. perlevis*, *H. heliophila*, and *H. sinapium*,  
390 the *H. perlevis/heliophila/sinapium* clade is well demarcated compared to other species.  
391 Sequences from closely related *H. flavia* differ by 8.4—9.7%. Attempts to align other  
392 published Halichondridae sequences at this locus failed due to very high sequence  
393 divergence.

394  
395 A large mitochondrial dataset is also available at the Folmer barcoding region of the *cox1*  
396 locus (571 bp; fig. 2). A single haplotype was shared among populations from China,  
397 Korea, Southern California, Florida, and Portugal. Samples from Argentina contained  
398 only 1–2 differences (99.6% identity) compared to this world-wide haplotype. The only  
399 sample that is more than 0.5% divergent from this common haplotype, out of all *H.*  
400 *perlevis/sinapium/heliophila* available, is a single sequence from Rio de Janeiro, Brazil  
401 (1.2% divergent; top of fig. 2). No morphological description of this sample is available  
402 in the related publication (Turque et al. 2008), but it states that vouchers were deposited  
403 in the Museu Nacional, Universidade Federal do Rio de Janeiro. Personal  
404 communications with Guilherme Muricy at the Museu Nacional indicate that this sample  
405 matches *H. heliophila* in both gross morphology and spicular morphology, as described  
406 in Muricy and Hajdu 2006 (p. 53). This sample is discussed further below.

407

408 Though I found that *H. perlevis*, *H. heliophila*, and *H. sinapium* shared an identical  
409 genotype at 571 bp of *cox1*, the *cox1* locus is known to have a slower evolutionary rate in  
410 sponges than most other animals (Huang et al. 2008). Additional interspecific sequence  
411 comparisons provide context for this lack of divergence. First, the *H.*  
412 *perlevis/heliophila/sinapium* clade is differentiated from its closest relative, *H. flavia*,  
413 with 2.5 - 4.5% sequence divergence (2.5 - 3.7% if the sample from Rio de Janeiro is  
414 excluded). Additionally, Genbank data illustrate that most named species in the  
415 Suberitida are genetically distinguishable at *cox1*. Excluding the *H.*  
416 *perlevis/heliophila/sinapium* clade, a *cox1* sequence is available from 58 vouchers across  
417 39 species for the order Suberitida. I determined sequence divergence between each  
418 voucher and the most similar sequence from a different species. In only one case are two  
419 sequences identical over a continuous 500 bp or more. This case is for sequences  
420 identified as *Suberites pagurorum* and *Suberites domuncula*, which are themselves  
421 members of a species complex in need of taxonomic revision (Solé-Cava and Thorpe  
422 1986). Across all 58 comparisons, average sequence divergence to the most similar  
423 conspecific voucher was 3.7% (standard deviation = 3.2%).  
424

425 Less data is available for the 18S and 28S rDNA loci, but the 18S locus once again  
426 illustrates the genetic similarity of Atlantic *H. perlevis/heliophila* populations and Pacific  
427 *H. sinapium* populations (figure 2). Over the aligned 1,642 bp, samples from China  
428 shared an identical haplotype with samples from Argentina. A sample of *H. perlevis* from  
429 Ireland differs from this common haplotype by only a single base pair (this is the closest  
430 available data to the type locality for *H. perlevis*, which is the Devon Coast in England).  
431 Only a single data point has any notable divergence: a sponge identified as *H. heliophila*  
432 from the USA. This sample is separated from all others by 12 substitutions (0.7%  
433 divergence). I created a phylogeny including selected Halichondridae to place this  
434 divergence in context (figure 3). While all other sequences of *H.*  
435 *perlevis/heliophila/sinapium* form a clade, this USA sample is as divergent as other  
436 distinct species. The interior nodes of this phylogeny are not well resolved, but it is clear  
437 that this sequence is an outlier and likely from a different species. This sample (NCI217,  
438 Smithsonian voucher #0M9G1074-H) is part of a collection of sponges for the National  
439 Cancer Institute deposited at the Smithsonian Museum of Natural History (Redmond et al.  
440 2013). It was collected by the Coral Reef Research Foundation in the Florida Keys (Key  
441 Largo, from mud substrate), and identified by Belinda Glasby (William Moser,  
442 Smithsonian Museum of Natural History, pers. comm.). It is discussed further below.  
443 Divergence between all other sequences in the *H. perlevis/heliophila/sinapium* clade and  
444 the most closely related species available (*Halichondria bowerbanki*) is 1.4 - 1.8%. This  
445 is less divergence than at the ITS and *cox1* loci, indicating lower power to discriminate  
446 among species on a per-base basis. The aligned region is 3 times longer than *cox1* and 7  
447 times longer than ITS, however.  
448

449 The D3–D5 region of 28S also allowed for an interesting comparison (figure 3). The only  
450 data available at this locus is from two European samples and two from the Florida Keys,  
451 USA. One of the Florida sequences is from the same isolate as the outlier at 18S  
452 (NCI217), while the other sample is from the same collection (NCI083, Smithsonian  
453 voucher #0M9G1369-A) (Thacker et al. 2013). It was collected in the Florida Keys

454 (Marquesas Key, sand substrate; William Moser, pers. comm.) In agreement with the 18S  
455 data, these samples do not appear to be from the same species as the European ones.

456

#### 457 **Discussion**

458 Genetic data provide strong support for the synonymy of *H. perlevis* and *H. sinapium*.  
459 The type locality for *H. sinapium* is Newport Bay, in Southern California (de Laubenfels  
460 1932). Previously, the only genetic data from Southern California was from a single  
461 sample from Mission Bay, roughly 140 km to the South of the type location. To this I  
462 have added additional data from Santa Barbara County (200 km North of the type  
463 location). All of these samples are genetically identical to samples of *H. perlevis*. Indeed,  
464 there is no appreciable genetic divergence between any sample from California, Japan,  
465 Korea or Europe. One of the loci investigated, the ITS locus, is the fastest-evolving locus  
466 regularly used in sponge systematics. It evolves too fast to be informative above the level  
467 of family (Wörheide et al. 2004), and is more commonly used to infer population  
468 structure within species (Wörheide et al. 2002, Duran et al. 2004). The *cox1* locus  
469 evolves more slowly, but I found that it still shows an average of 3.7% sequence  
470 divergence within this order of sponges, and a published data spanning phylum Porifera  
471 found an average of 4.9% divergence (Huang et al. 2008). The 18S locus evolves more  
472 slowly still, but the longer alignment at this locus was sufficient to differentiate other  
473 species in the family, as shown in the phylogeny. It remains possible that genomic  
474 analyses could reveal reproductively isolated groups that are not differentiated at these  
475 particular genes (e.g. Turner et al. 2008). However, there is no reason to assume any such  
476 "cryptic species" would be associated with the geographic regions previously ascribed to  
477 *H. perlevis* and *H. sinapium*. I therefore formally propose that *H. sinapium* de Laubenfels  
478 (1930) be considered a junior synonym of *H. perlevis* Montagu (1814).

479

480 It is possible that *H. heliophila* is also a junior synonym of *H. perlevis*, but some  
481 ambiguity remains. Genetic data illustrate that the majority of samples identified as *H.*  
482 *heliophila* are in fact *H. perlevis*, including the only one from North Carolina, which  
483 contains the type location. The two National Cancer Institute vouchers from Florida,  
484 however, appear to be from a different species. One *cox1* sequence from Brazil is also  
485 modestly divergent, and could be from another species. It is possible that there are two  
486 morphologically similar *Hymeniacidon* within the range ascribed to *H. heliophila*,  
487 mirroring the case of *H. sinapium* and *H. flavia* in Japan and Korea. Though further work  
488 will be required to determine if the name *H. heliophila* is valid, it is clear that the most  
489 common sponge matching its description is in fact *H. perlevis*, whose range therefore  
490 includes North Carolina, Florida, Alabama and Argentina at the very least.

491

492 Ecological and morphological data also support these far-flung populations being within  
493 the same species. It should be noted, however, that there is another species that is  
494 morphologically similar yet genetically distinct. The genetic outgroup to the *H.*  
495 *perlevis/heliophila/sinapium* clade is *H. flavia*, known from Japan and Korea (Park et al.  
496 2007; Hoshino et al. 2008). This species is sympatric with *H. sinapium* in Japan and  
497 Korea, and cannot be distinguished from it based on spicular morphology. These species  
498 can only be identified using genetic data, color when alive, or larval morphology (Sim  
499 and Lee 2003; Hoshino et al. 2008). This illustrates that it may be difficult to resolve the

500 taxonomy of *Hymeniacion* without genetic data. As pointed out by Gastaldi et al.  
501 (Gastaldi et al. 2018), there are additional species with morphological descriptions  
502 matching *H. perlevis*, but the existence of *H. flavia* shows that confidently determining  
503 which are synonyms will require DNA data.

504

505 Data on larval biology are available for *H. perlevis*, and they support a hypothesis of  
506 recent range expansion via human facilitation. Larvae of *H. perlevis* are non-tufted  
507 parenchymella, and do not appear to differ in their dispersal time compared to other  
508 studied species (Xue et al. 2009). In the lab, all larvae stopped swimming and were  
509 exploring the benthos by 19 hours after release, and all had settled by 43 hours. In  
510 unfavorable conditions the larvae may travel farther: under high artificial illumination  
511 (which increased mortality), sponge larvae swam for a maximum of 24 hours and some  
512 were still exploring the benthos when the experiment was terminated at 68 hours. These  
513 data are consistent with the larval ecology of other sponges (Maldonado 2006). It  
514 therefore seems unlikely that the larvae of this species have exceptionally higher  
515 dispersal than to other sponges.

516

517 The data do not seem sufficient to form a strong hypothesis about the native range of this  
518 species. It seems unlikely to be California, as almost no genetic variation was found at  
519 the ITS or *cox1* loci in that region. Moreover, the species has likely undergone range  
520 expansion in California between the 1920s and the present. Europe is perhaps the most  
521 likely source, as we know it was present there in the early 1800s. The genetic diversity at  
522 *cox1* in Portugal seems notably higher than the diversity at the ITS locus in Asia, though  
523 better support would clearly come from comparing data from the same locus.

524

525 Future work will be needed to understand what impact this species has on host  
526 ecosystems. Its abundance in some habitats seems to make impacts likely, if for no other  
527 reason than the occupation of space (Wasson et al. 2001). It is also notable that it has  
528 successfully colonized the kelp forests in California, which have been relatively resistant  
529 to invasion (Steneck et al. 2002). Within these kelp forests, my observations suggest that  
530 this species can be monitored, if imperfectly, using roving diver surveys or photo  
531 transects. Though some sponges would require follow-up confirmation in the lab, this  
532 might allow the existing large-scale monitoring efforts in California to include this  
533 species (Claisse et al. 2018; Miller et al. 2018).

534

535 The work presented here builds on the excellent previous work of many authors, and  
536 aspects of the pattern I describe have certainly been recognized by others. Hoshino et al.  
537 (2008) and Gastaldi et al. (2018) both remarked upon the similarity of *Hymeniacion* in  
538 the *H. perlevis* clade, though in both cases they referred to this clade as a species complex  
539 that might be synonymized in the future. Others have simply started referring to their  
540 samples by the senior synonym *H. perlevis*, even if they are within the range ascribed to  
541 one of the other taxa (Xue et al. 2009; Gastaldi et al. 2018). I build on these earlier efforts  
542 by adding data from Southern California and, for the first time, presenting all the genetic  
543 data from other projects in one analysis. I recommend synonymizing *H. sinapium* and *H.*  
544 *perlevis*, and recognizing that *H. perlevis* is an invasive species with a global distribution.



545 My hope is that recognition of the unusual distribution and abundance of this species  
546 motivates further work into its ecology and ecological impacts.

547

#### 548 **Acknowledgements**

549 I am grateful for the help and support of many people in UCSB's Marine Science Institute  
550 and Diving & Boating Program, especially Robert Miller, Clint Nelson, Christoph Pierre,  
551 Frankie Puetzer, Christian Orsini, H. Mark Page, and Alecia Dezzani. Steve Lonhart  
552 (NOAA) and Shannon Myers (UCSC) were instrumental in facilitating collections in  
553 Central California, and the Natural History Museum of Los Angeles' DISCO program  
554 facilitated collections in Los Angeles County.

555

#### 556 **Funding declaration**

557 Financial support was provided by UCSB and by the National Aeronautics and Space  
558 Administration Biodiversity and Ecological Forecasting Program (Grant  
559 NNX14AR62A); the Bureau of Ocean Energy Management Environmental Studies  
560 Program (BOEM Agreement MC15AC00006); the National Oceanic and Atmospheric  
561 Administration in support of the Santa Barbara Channel Marine Biodiversity Observation  
562 Network; and the U.S. National Science Foundation in support of the Santa Barbara  
563 Coastal Long Term Ecological Research program under Awards OCE-9982105, OCE-  
564 0620276, OCE-1232779, OCE-1831937. The funders had no role in study design, data  
565 collection and analysis, decision to publish, or preparation of the manuscript.

566

#### 567 **References**

- 568 Alex A, Silva V, Vasconcelos V, Antunes A (2013) Evidence of unique and generalist  
569 microbes in distantly related sympatric intertidal marine sponges (Porifera:  
570 Demospongiae). *Plos One* 8(11): e80653
- 571 Alex A, Vasconcelos V, Tamagnini P, Santos A, Antunes A (2012) Unusual symbiotic  
572 cyanobacteria association in the genetically diverse intertidal marine sponge  
573 *Hymeniacidon perlevis* (Demospongiae, Halichondrida). *Plos One* 7(12): e51834
- 574 Bakus GJ, Green KD (1987) The distribution of marine sponges collected from the 1976-  
575 1978 Bureau of Land Management Southern California Bight program. *Bulletin of*  
576 *the Southern California Academy of Sciences* 86(2): 57–88
- 577 Bandelt H, Forster P, Röhl A (1999) Median-joining networks for inferring intraspecific  
578 phylogenies. *Molecular Biology and Evolution* 16(1): 37–48
- 579 Bax N, Williamson A, Aguero M, Gonzalez E, Geeves W (2003) Marine invasive alien  
580 species: a threat to global biodiversity. *Marine Policy* 27(4): 313–323
- 581 Bergquist PR (1961) A collection of Porifera from Northern New Zealand, with  
582 descriptions of seventeen new species. *Pacific Science* 15(1): 33–48
- 583 Bergquist PR (1970) The marine fauna of New Zealand: Porifera, Demospongiae. Part 2



- 584 (Axinellida and Halichondrida). *Bulletin New Zealand Department of Scientific and*  
585 *Industrial Research [Memoir New Zealand Oceanographic Institute] 51: 9–85*
- 586 Byrnes J, Stachowicz JJ (2009) Short and long term consequences of increases in exotic  
587 species richness on water filtration by marine invertebrates. *Ecology Letters* 12:  
588 830–841
- 589 Carballo JL, Aguilar-Camacho JM, Knapp IS, Bell JJ (2013) Wide distributional range of  
590 marine sponges along the Pacific Ocean. *Marine Biology Research* 9(8): 768–775
- 591 Chombard C, Boury-Esnault N, Tillier S (1998) Reassessment of homology of  
592 morphological characters in tetractinellid sponges based on molecular data.  
593 *Systematic Biology* 47: 351–366
- 594 Claisse JT, Blanchette CA, Dugan JE, Williams JP, Freiwald J, II DJP, Schooler NK,  
595 Hubbard DM, Davis K, Zahn LA, Williams CM, Caselle JE (2018) Biogeographic  
596 patterns of communities across diverse marine ecosystems in southern California.  
597 *Marine Ecology* 39(S1): e12453
- 598 Desqueyroux-Faúndez R, Soest RWM Van (1997) Shallow water demosponges of the  
599 Galapagos Islands. *Revue Suisse de Zoologie* 104: 379–467
- 600 Diaz MC, Pomponi S, Soest R van (1993) A systematic revision of the Central West  
601 Atlantic Halichondrida (Demospongiae, Porifera). Part III. Description of valid  
602 species. *Scientia Marina* 57(4): 283–306
- 603 Duran S, Giribet G, Turon X (2004) Phylogeographical history of the sponge *Crambe*  
604 *crambe* (Porifera, Poecilosclerida): range expansion and recent invasion of the  
605 Macaronesian islands from the Mediterranean Sea. *Molecular Ecology* 13: 109–122
- 606 Erpenbeck D, Breeuwer JAJ, Parra-Velandia FJ, Soest RWM van (2006) Speculation  
607 with spiculation?—Three independent gene fragments and biochemical characters  
608 versus morphology in demosponge higher classification. *Molecular Phylogenetics*  
609 *and Evolution* 38: 293–305
- 610 Erpenbeck D, Breeuwer JAJ, Soest RWM van (2005) Implications from a 28S rRNA  
611 gene fragment for the phylogenetic relationships of halichondrid sponges (Porifera:  
612 Demospongiae). *Journal of Zoological Systematics and Evolutionary Research*  
613 43(2): 93–99
- 614 Erpenbeck D, Breeuwer JAJ, Velde HC van der, Soest RWM van (2002) Unravelling  
615 host and symbiont phylogenies of halichondrid sponges (Demospongiae, Porifera)  
616 using a mitochondrial marker. *Marine Biology* 141: 377–386
- 617 Erpenbeck D, Duran S, Rützler K, Paul VJ, Hooper JNA, Wörheide G (2007) Towards a

- 618 DNA taxonomy of Caribbean demosponges: a gene tree reconstructed from partial  
619 mitochondrial CO1 gene sequences supports previous rDNA phylogenies and  
620 provides a new perspective on the systematics of Demospongiae. *Journal of the*  
621 *Marine Biological Association of the United Kingdom* 87(6): 1563–1570
- 622 Erpenbeck D, McCormack GP, Breeuwer JAJ, Soest RWM van (2004) Order level  
623 differences in the structure of partial LSU across demosponges (Porifera): new  
624 insights into an old taxon. *Molecular Phylogenetics and Evolution* 32: 388–395
- 625 Erpenbeck D, Soest RWM Van (2002) Family Halichondridae Gray, 1867. Systema  
626 Porifera: A Guide to the Classification of Sponges. pp 787–815
- 627 Erwin PM, Olson JB, Thacker RW (2011) Phylogenetic diversity, host-specificity and  
628 community profiling of sponge-associated bacteria in the northern Gulf of Mexico.  
629 *Plos One* 6(11): e26806
- 630 Folmer O, Black MB, Wr H, Vrijenhoek RC (1994) DNA primers for amplification of  
631 mitochondrial Cytochrome C oxidase subunit I from diverse metazoan invertebrates.  
632 *Molecular marine biology and biotechnology* 3(5): 294–299
- 633 Freitas FH, Siegel DA, Maritorea S, Fields E (2017) Satellite assessment of particulate  
634 matter and phytoplankton variations in the Santa Barbara Channel and its  
635 surrounding waters: Role of surface waves. *JGR Oceans* 122(1): 355–371
- 636 Fuller TL, Hughey JR (2013) Molecular investigation of the invasive sponge  
637 *Hymeniacidon sinapium* (de Laubenfels, 1930) in Elkhorn Slough, California.  
638 *Aquatic Invasions* 8(1): 59–66
- 639 Gastaldi M, Paula TS De, Narvarte MA, Lôbo-Hajdu G, Hajdu E (2018) Marine sponges  
640 (Porifera) from the Bahía San Antonio (North Patagonian Gulfs, Argentina), with  
641 additions to the phylogeography of the widely distributed *Cliona aff. celata* and  
642 *Hymeniacidon perlevis*, and the description of two new species. *Marine Biology*  
643 *Research* 14(7): 682–716
- 644 Goeij JM de, Oevelen D van, Vermeij MJA, Osinga R, Middelburg JJ, Goeij AFPM de,  
645 Admiraal W (2013) Surviving in a marine desert: The sponge loop retains resources  
646 within coral reefs. *Science* 342(6154): 108–110
- 647 Green KJ, Bakus GJ (1994) Taxonomic atlas of the benthic marine fauna of the Western  
648 Santa Maria Basin and the Western Santa Barbara Channel. Volume 2: The Porifera.  
649 82 pp
- 650 Henkel D, Janussen D (2011) Redescription and new records of *Celtodoryx*  
651 *ciocalyptoides* (Demospongiae: Poecilosclerida) A sponge invader in the north east  
652 Atlantic Ocean of Asian origin? *Journal of the Marine Biological Association of the*

- 653 UK 91: 347–355
- 654 Hoang DT, Chernomor O, Haeseler A von, Minh BQ, Vinh LS (2018) UFBoot2:  
655 Improving the ultrafast bootstrap approximation. *Molecular Biology and Evolution*  
656 35: 518–522
- 657 Hofknecht G (1978) Descriptions and key to the intertidal sponges of the Puerto Peñasco  
658 area in the Gulf of California. *Journal of the Arizona-Nevada Academy of Science*  
659 13(2): 51–56
- 660 Hoshino S, Saito DS, Fujita T (2008) Contrasting genetic structure of two Pacific  
661 *Hymeniacidon* species. *Hydrobiologia* 603: 313–326
- 662 Huang D, Meier R, Todd PA, Chou LM (2008) Slow mitochondrial COI sequence  
663 evolution at the base of the metazoan tree and Its implications for DNA barcoding.  
664 *Journal of Molecular Evolution* 66: 167–174
- 665 Jun J, Yu JN, Choi EH (2015) Complete mitochondrial genome of *Hymeniacidon*  
666 *sinapium* (Demospongiae, Halichondriidae). *Mitochondrial DNA* 26(2): 261–262
- 667 Knowlton N (1993) Sibling species in the sea. *Annual Review of Ecology and Systematics*  
668 24: 189–216
- 669 Laubenfels M de (1930) The Sponges of California. *Stanford University Bulletin* 5(98):  
670 24–29
- 671 Laubenfels M de (1932) The marine and fresh-water sponges of California. *Proceedings*  
672 *of the US National Museum* 81(4): 1–140
- 673 Lee WL, Elvin DW, Reiswig HM (2007) The Sponges of California: A Guide and Key to  
674 the Marine Sponges of California. Monterey Bay Sanctuary Foundation, 130 pp
- 675 Leigh J, Bryant D (2015) PopART: Full-feature software for haplotype network  
676 construction. *Methods in Ecology and Evolution* 6(9): 1110–1116
- 677 Letunic I, Bork P (2019) Interactive Tree Of Life (iTOL) v4: recent updates and new  
678 developments. *Nucleic Acids Research* 47(W1): W256–W259
- 679 MacGinitie GE (1935) Ecological aspects of a California marine estuary. *American*  
680 *Midland Naturalist* 16(5): 629-765
- 681 Maldonado M (2006) The ecology of the sponge larva. *Canadian Journal of Zoology* 84:  
682 175–194
- 683 Maldonado M, Ribes M, Duyl FC van (2012) Nutrient fluxes through sponges: biology,  
684 budgets, and ecological implications. *Advances in Marine Biology* 62: 113–182

- 685 Miller RJ, Lafferty KD, Lamy T, Kui L, Rassweiler A, Reed DC (2018) Giant kelp,  
686 *Macrocystis pyrifera*, increases faunal diversity through physical engineering.  
687 *Proceedings of the Royal Society B* 285: 20172571
- 688 Miralles L, Ardura A, Arias A, Borrell YJ, Clusa L, Dopico E, Rojas AH de, Lopez B,  
689 Muñoz-Colmenero M, Roca A, Valiente AG, Zaiko A, Garcia-Vazquez E (2016)  
690 Barcodes of marine invertebrates from north Iberian ports: native diversity and  
691 resistance to biological invasions. *Marine Pollution Bulletin* 112(1-2): 183–188
- 692 Montagu G (1814) An essay on sponges, with descriptions of all the species that have  
693 been discovered on the coast of Great Britain. *Memoirs of the Wernerian Natural*  
694 *History Society* 2(1): 67–122
- 695 Morrow C, Cárdenas P (2015) Proposal for a revised classification of the Demospongiae  
696 (Porifera). *Frontiers in Zoology* 12(7): 1–27
- 697 Morrow CC, Redmond NE, Picton BE, Thacker RW, Collins AG, Maggs CA, Sigwart JD,  
698 Allcock AL (2013) Molecular phylogenies support homoplasy of multiple  
699 morphological characters used in the taxonomy of Heteroscleromorpha (Porifera:  
700 Demospongiae). *Integrative and Comparative Biology* 53(3): 428–446
- 701 Muricy G, Hajdu E (2006). Porifera Brasilis. Guia de identificação das esponjas mais  
702 comuns do Sudeste do Brasil. Eclesiarte, Rio de Janeiro. 104 pp.
- 703 Nguyen LT, Schmidt HA, Haeseler A von, Minh BQ (2015) IQ-TREE: A fast and  
704 effective stochastic algorithm for estimating maximum likelihood phylogenies.  
705 *Molecular Biology and Evolution* 32: 268–274
- 706 Park MH, Sim CJ, Baek J, Min GS (2007) Identification of genes suitable for DNA  
707 barcoding of morphologically indistinguishable Korean Halichondriidae sponges.  
708 *Molecules and Cells* 23(2): 220–227
- 709 Redmond NE, Morrow CC, Thacker RW, Diaz MC, Boury-Esnault N, Cárdenas P, Hajdu  
710 E, Lobo-Hajdu G, Picton BE, Pomponi SA, Kayal E, Collins AG (2013) Phylogeny  
711 and systematics of Demospongiae in light of new small-subunit ribosomal DNA  
712 (18S) sequences. *Integrative and Comparative Biology* 53(3): 388–415
- 713 Regueiras A, Alex A, Costa MS, Pereira S, Vasconcelos V (2019) Diversity of intertidal  
714 marine sponges from the western coast of Portugal (North-east Atlantic). *Journal of*  
715 *the Marine Biological Association of the United Kingdom* 99(6): 1253–1265
- 716 Reiswig HM (1971) Particle feeding in natural populations of three marine Demosponges.  
717 *Biological Bulletin* 141(3): 568–591
- 718 Rot C, Goldfarb I, Ilan M, Huchon D (2006) Putative cross-kingdom horizontal gene

- 719 transfer in sponge (Porifera) mitochondria. *BMC Evolutionary Biology* 6: 71
- 720 Ruiz GM, Fofonoff PW, Carlton JT, Wonham MJ, Hines AH (2000) Invasion of coastal  
721 marine communities in North America: Apparent patterns, processes, and biases.  
722 *Annual Reviews of Ecology and Systematics* 31: 481–531
- 723 Samaai T, Gibbons MJ (2005) Demospongiae taxonomy and biodiversity of the Benguela  
724 region on the west coast of South Africa. *African Natural History* 1: 1–96
- 725 Schneider CA, Rasband WS, Eliceiri KW (2012) NIH Image to ImageJ: 25 years of  
726 image analysis. *Nature methods* 9(7): 671–675
- 727 Sim CJ (1985) A systematic study on the marine sponges from the South Sea and the  
728 Yellow Sea of Korea. *Korean Journal of Systematic Zoology* 1: 21–30
- 729 Sim CJ, Bakus GJ (1986) Marine sponges of Santa Catalina Island, California. *Allan*  
730 *Hancock Foundation Occasional Papers (New Series)* 5: 1–23
- 731 Sim CJ, Lee KJ (2003) A new species of the genus *Hymeniacion* (Demospongiae:  
732 Halichondrida: Halichondriidae) from Korea. *Korean Journal of Biological Sciences*  
733 7(3): 187–189
- 734 Van Soest RWM, Boury-Esnault N, Hooper JNA, Rützler K, de Voogd NJ, Alvarez B,  
735 Hajdu E, Pisera AB, Manconi R, Schönberg C, Klautau M, Kelly M, Vacelet J,  
736 Dohrmann M, Díaz M-C, Cárdenas P, Carballo JL, Ríos P, Downey R, Morrow CC  
737 (2020a) *Hymeniacion perlevis* (Montagu, 1814). World Porifera Database
- 738 Van Soest RWM, Boury-Esnault N, Hooper JNA, Rützler K, de Voogd NJ, Alvarez B,  
739 Hajdu E, Pisera AB, Manconi R, Schönberg C, Klautau M, Kelly M, Vacelet J,  
740 Dohrmann M, Díaz M-C, Cárdenas P, Carballo JL, Ríos P, Downey R, Morrow CC  
741 (2020b) *Hymeniacion luxurians* (Lieberkühn, 1859). World Porifera Database
- 742 Van Soest RWM, Boury-Esnault N, Hooper JNA, Rützler K, de Voogd NJ, Alvarez B,  
743 Hajdu E, Pisera AB, Manconi R, Schönberg C, Klautau M, Kelly M, Vacelet J,  
744 Dohrmann M, Díaz M-C, Cárdenas P, Carballo JL, Ríos P, Downey R, Morrow CC  
745 (2020c) *Hymeniacion heliophila* (Wilson, 1911). World Porifera Database
- 746 Solé-Cava AM, Thorpe JP (1986) Genetic differentiation between morphotypes of the  
747 marine sponge *Suberites ficus* (Demospongiae:Hadromerida). *Marine Biology* 93:  
748 247-253
- 749 Steneck RS, Graham MH, Bourque BJ, Corbett D, Erlandson JM, Estes JA, Tegner MJ  
750 (2002) Kelp forest ecosystems: biodiversity, stability, resilience and future.  
751 *Environmental Conservation* 29(4): 436–459
- 752 Thacker RW, Hill AL, Hill MS, Redmond NE, Collins AG, Morrow CC, Spicer L,



- 753 Carmack CA, Zappe ME, Pohlmann D, Hall C, Diaz MC, Bangalore P V. (2013)  
754 Nearly complete 28S rRNA gene sequences confirm new hypotheses of sponge  
755 evolution. *Integrative and Comparative Biology* 53(3): 373–387
- 756 Thiele J (1905) Die Kiesel- und Hornschwämme der Sammlung Plate. 407-496 pp
- 757 Trifinopoulos J, Nguyen LT, Haeseler A von, Minh BQ (2016) W-IQ-TREE: a fast  
758 online phylogenetic tool for maximum likelihood analysis. *Nucleic Acids Research*  
759 44(W1): W232–W235
- 760 Turner TL, Hahn MW, Nuzhdin SV (2008) Genomic islands of speciation in *Anopheles*  
761 *gambiae*. *PLoS Biology* 3(9): e285
- 762 Turque AS, Cardoso AM, Silveira CB, Vieira RP, Freitas FAD, Albano RM, Gonzalez  
763 AM, Paranhos R, Muricy G, Martins OB (2008) Bacterial communities of the  
764 marine sponges *Hymeniacidon heliophila* and *Polymastia janeirensis* and their  
765 environment in Rio de Janeiro. *Marine Biology* 155: 135–146
- 766 Wasson K, Zabin CJ, Bedinger L, Diaz MC, Pearse JS (2001) Biological invasions of  
767 estuaries without international shipping: the importance of intraregional transport.  
768 *Biological Conservation* 102: 143–153
- 769 Watson JR, Mitarai S, Siegel DA, Caselle JE, Dong C, McWilliams JC (2010) Realized  
770 and potential larval connectivity in the Southern California Bight. *Marine Ecology*  
771 *Progress Series* 401: 31–48
- 772 Weigel BL, Erwin PM (2016) Intraspecific variation in microbial symbiont communities  
773 of the sun sponge, *Hymeniacidon heliophila*, from intertidal and subtidal habitats.  
774 *Applied and Environmental Microbiology* 82: 650–658
- 775 Welsh JE, Steenhuis R, de Moraes KR, van der Meer J, Thielges DW, Brussaard CPD  
776 (2020) Marine virus predation by non-host organisms. *Scientific Reports* 10: 5221
- 777 Wilson HV (1911) Development of sponges from dissociated tissue cells. *Bulletin of the*  
778 *Bureau of Fisheries* 30: 1–30
- 779 Wörheide GT, Hooper JNA, Degnan BM (2002) Phylogeography of western Pacific  
780 *Leucetta 'chagosensis'* (Porifera: Calcarea) from ribosomal DNA sequences:  
781 implications for population history and conservation of the Great Barrier Reef  
782 World Heritage Area (Australia). *Molecular Ecology* 11: 1753–1768
- 783 Wörheide GT, Nichols SA, Goldberg J (2004) Intragenomic variation of the rDNA  
784 internal transcribed spacers in sponges (Phylum Porifera): implications for  
785 phylogenetic studies. *Molecular Phylogenetics and Evolution* 33: 816–830
- 786 Xavier JR, Rachello-Dolmen PG, Parra-Velandia F, Schönberg CHL, Breeuwer JAJ,

- 787           Soest RWM van (2010) Molecular evidence of cryptic speciation in the  
788           “cosmopolitan” excavating sponge *Cliona celata* (Porifera, Clionidae). *Molecular*  
789           *Phylogenetics and Evolution* 56: 13–20
- 790    Xue L, Zhang X, Zhang W (2009) Larval release and settlement of the marine sponge  
791           *Hymeniacidon perlevis* (Porifera, Demospongiae) under controlled laboratory  
792           conditions. *Aquaculture* 290: 132–139
- 793
- 794
- 795
- 796

797 **Table 1. Morphological data from newly collected samples with comparison data**  
798 **from the literature.**

799

| Sample                            | Date    | Collection location | N  | Style length    | Style width |
|-----------------------------------|---------|---------------------|----|-----------------|-------------|
| TLT550                            | 1/7/20  | Arroyo Quemado      | 25 | 151 - 262 - 336 | 3 - 5 - 7   |
| TLT79                             | 7/1/19  | Tajigus             | 26 | 121 - 223 - 322 | 3 - 5 - 7   |
| TLT87                             | 7/1/19  | Tajigus             | 21 | 147 - 216 - 326 | 2 - 5 - 8   |
| TLT109                            | 7/1/19  | Tajigus             | 32 | 138 - 289 - 415 | 4 - 6 - 8   |
| TLT339                            | 8/30/19 | Coal Oil Point      | 25 | 160 - 283 - 376 | 2 - 5 - 6   |
| TLT247                            | 7/31/19 | Carpinteria         | 20 | 129 - 223 - 319 | 4 - 5 - 7   |
| TLT129                            | 7/31/19 | Carpinteria         | 36 | 116 - 246 - 334 | 3 - 5 - 7   |
| TLT15955                          | 8/22/19 | Redondo Barge       | 25 | 127 - 235 - 407 | 3 - 5 - 7   |
| TLT349                            | 8/23/19 | Resort Wall         | 23 | 163 - 264 - 351 | 2 - 5 - 12  |
| <i>H. sinapium</i> <sup>1</sup>   | -       | Elkhorn Slough, CA  | -  | 115 - 460       | 3 - 12      |
| <i>H. perlevis</i> <sup>2</sup>   | -       | Wales               | -  | 152 - 475       | 3 - 12      |
| <i>H. perlevis</i> <sup>3</sup>   | -       | South Africa        | -  | 155 - 337       | 7           |
| <i>H. perlevis</i> <sup>4</sup>   | -       | New Zealand         | -  | 189 - 329       | 2 - 10      |
| <i>H. heliophila</i> <sup>5</sup> | -       | Caribbean           | -  | 130 - 450       | 3 - 10      |
| <i>H. fernandezi</i> <sup>6</sup> | -       | Chile               | -  | 200 - 340       | 3 - 10      |

800 Date = collection date, N = number of spicules measured, spicule dimensions given in  
801 format min - mean - max; when only two numbers are shown they are min - max.

802 Sources: 1: Lee et al. 2007; 2: Erpenback & Van Soest 2002; 3: Samaai & Gibbons 2005;

803 4: Bergquist 1970; 6: Thiele 1905.

804

805 **Figure 1.** Collection locations in the Southern California Channel Islands region. Sites  
806 where *H. sinapium* were found (black) and not found (white) are shown. The two sites  
807 away from the coastline are oil platforms. Collection sites in Central California are not  
808 shown.  
809

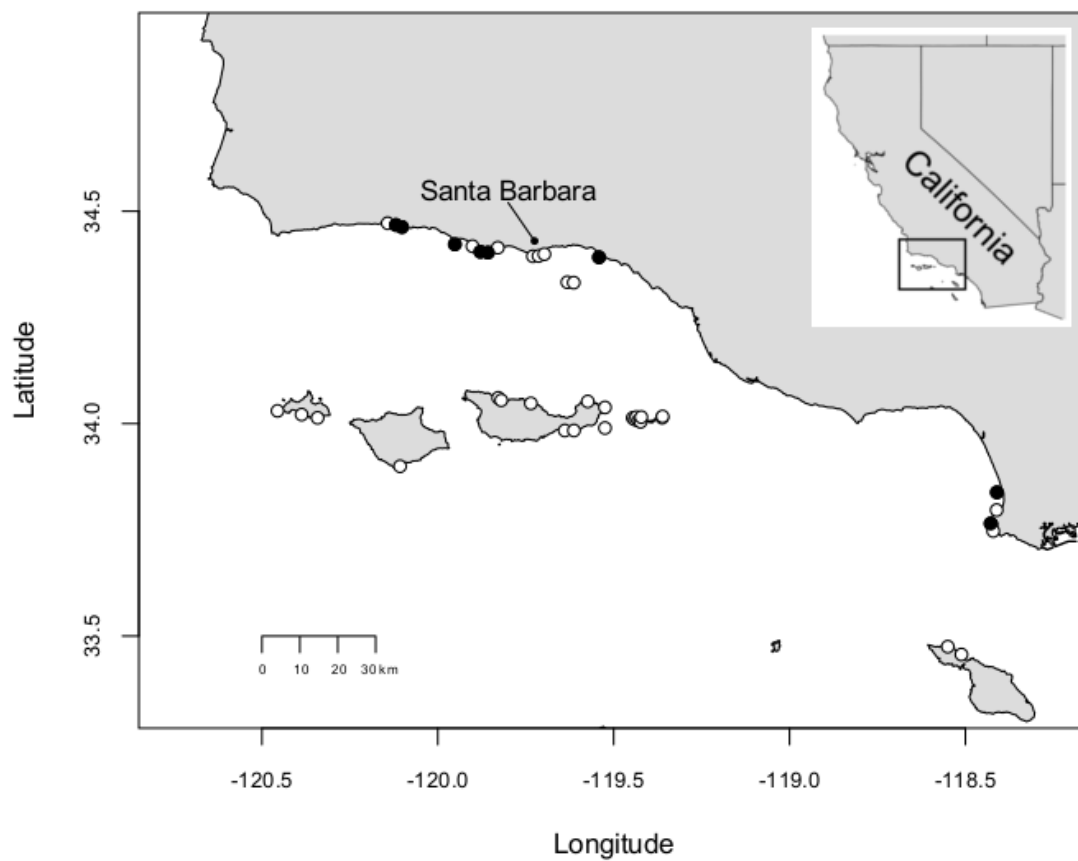

810  
811  
812  
813

814 **Figure 2.** Minimum-spanning genotype networks for three loci. Samples are coded by  
815 collection location, regardless of whether they were identified as *H. perlevis*, *H. sinapium*,  
816 or *H. heliophila*. Closely related *H. flavia* are shown for comparison where available; all  
817 data for this species is from Japan and Korea.  
818

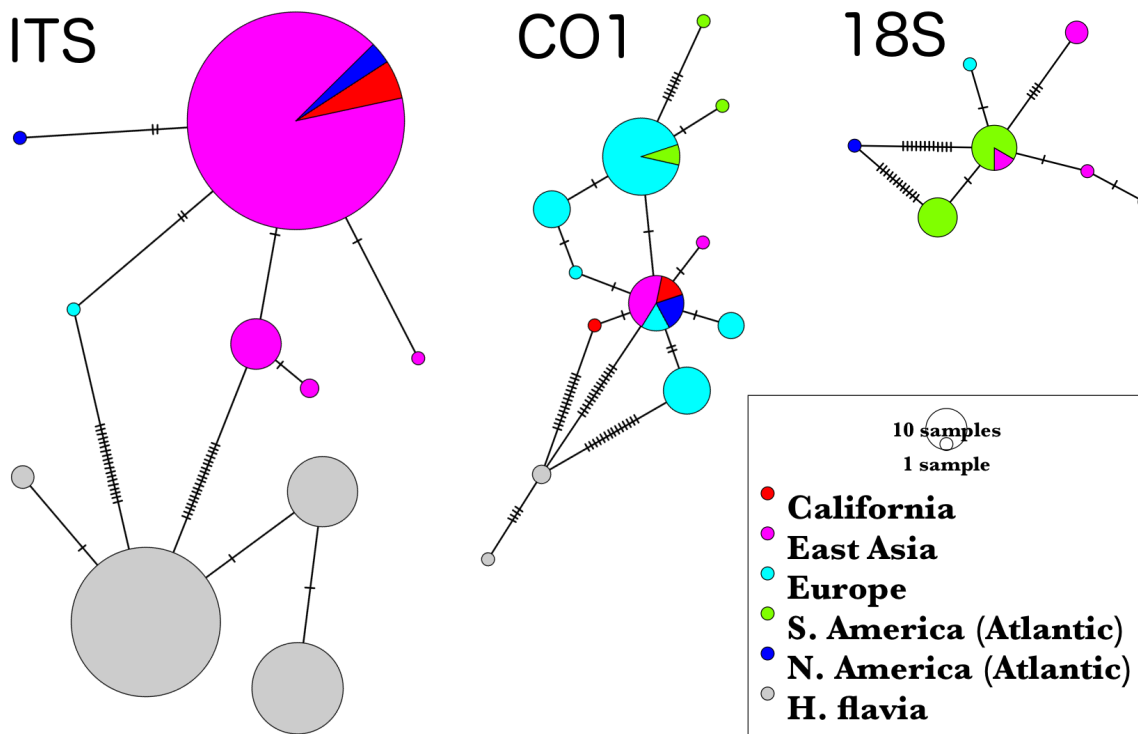

819  
820  
821  
822  
823



824 **Figure 3.** Phylogenies for the 18S and 28S loci. All samples identified as *H. perlevis*, *H.*  
 825 *sinapium* and *H. heliophila* are shown in bold with localities. Selected other  
 826 Halichondridae are shown for comparison, with *Suberites domuncula* specified as the  
 827 outgroup. Genbank accession numbers are also shown. Ultrafast Bootstrap support is  
 828 shown for all nodes with > 50% support.  
 829

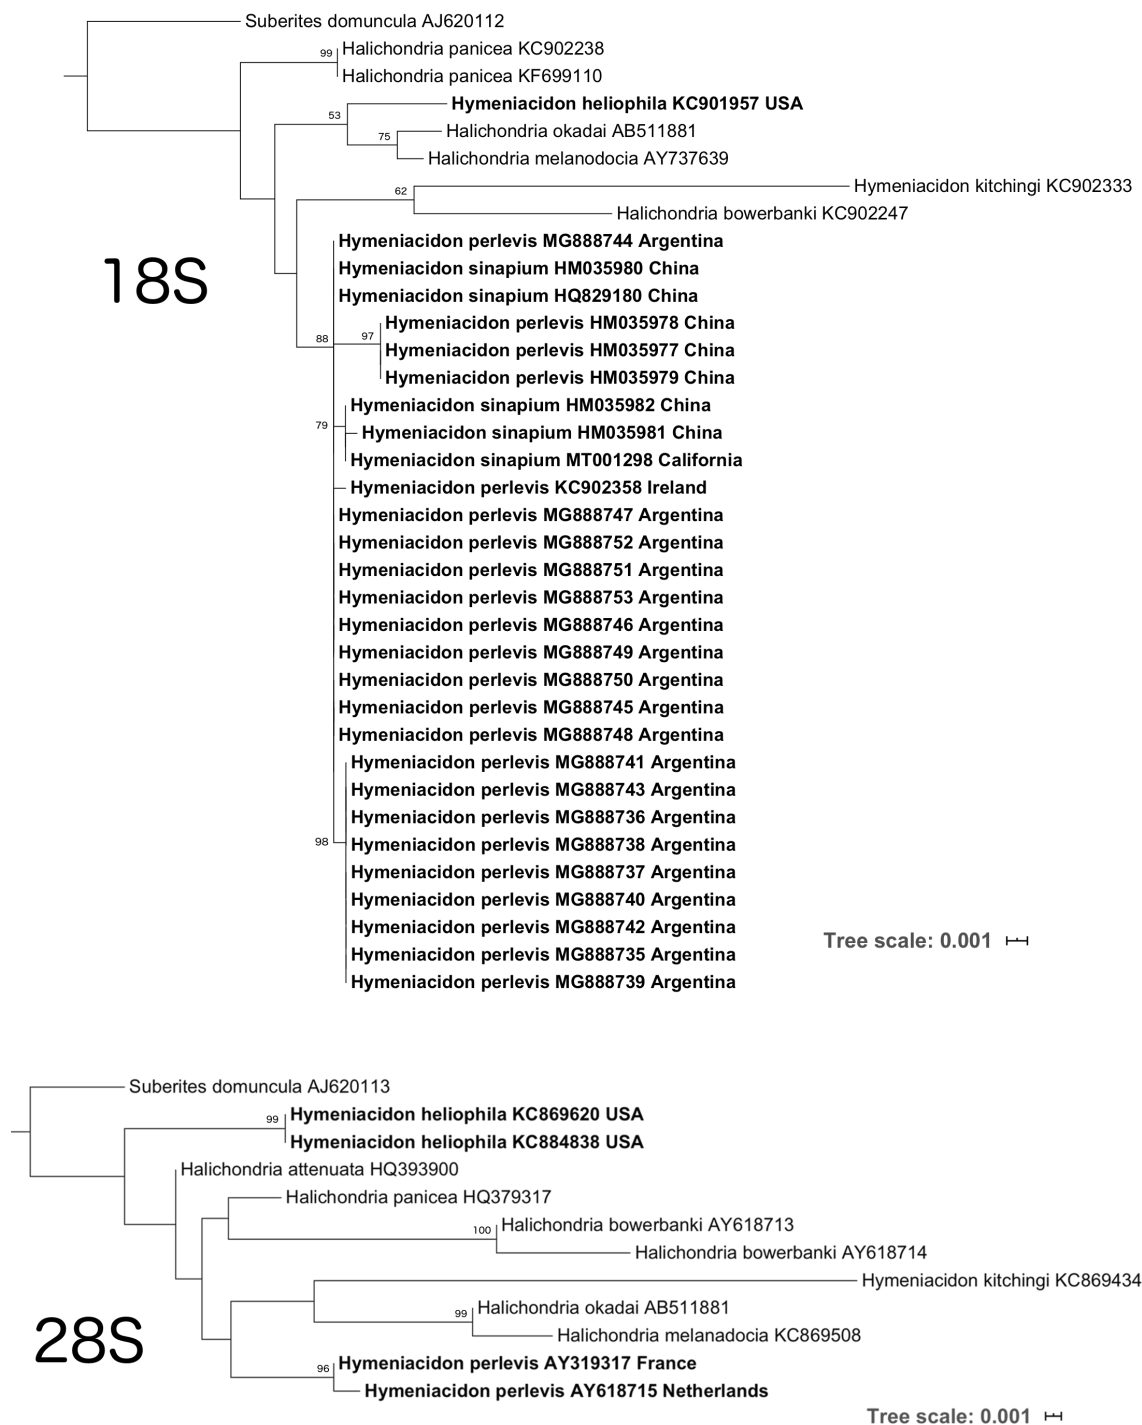

830  
 833
